# Supplementary material
Source: HighWire-hosted journal article supplement (https://bmjopen.bmj.com/content/10/3/e034027)
Supplement: inline-supplementary-material-1 [file inline-supplementary-material-1.pdf]

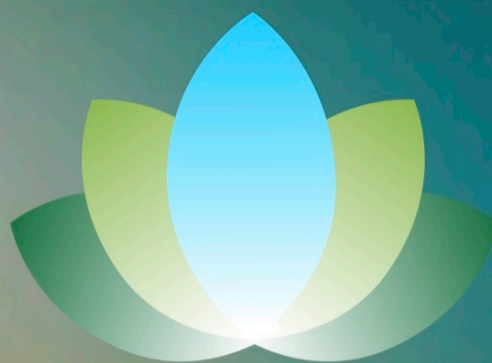

# VIDEA

Begeben Sie sich auf Ihre Reise zu  
Ihrem aktiveren Selbst!

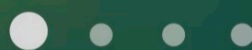

**LOS GEHT`S**

[Ich habe schon ein Konto](#)
