# Supplementary material
Source: HighWire-hosted journal article supplement (https://bmjopen.bmj.com/content/10/3/e034027)
Supplement: inline-supplementary-material-2 [file inline-supplementary-material-2.pdf]

**Etappen**

**0 % abgeschlossen**

Sie haben 0 von 8 Etappen abgeschlossen

0 von 4 Abgeschlossen

**1**  
Etappe

**Etappe 1**  
**Bewegung liegt uns in den Genen**

Sie erfahren, warum Bewegung so wichtig ist, werden gemeinsam mit Ivonne aktiv und stärken Ihre Motivation.

**STARTEN**

**Etappen** Fokus Aktivität Video + Austausch
