# Supplementary material
Source: HighWire-hosted journal article supplement (https://bmjopen.bmj.com/content/10/3/e034027)
Supplement: inline-supplementary-material-3 [file inline-supplementary-material-3.pdf]

<

Etappe 1

3 von 4 abgeschlossen

Etappe 1

Muskeln, Myokine und gute Laune

Der aktivierte Muskel beeinflusst Ihr körperliches und seelisches Wohlbefinden! Erfahren Sie wie Sie das für sich nutzen können.

Video 1

Steinzeit versus heute - Wir sind für Bewegung gemacht

✓

3,5 Min

Video 2

Training mit Ivonne 1

✓

22,5 Min

Video 3

Finden Sie Ihr Warum

✓

2,3 Min

Video 4

Praxistipp Nordic Walking

✓

2,5 Min

Quiz

Testen Sie Ihr Wissen!

1,5 Min

Etappen

Fokus

Aktivität

Video +

Austausch

Fischer T, et al. BMJ Open 2020; 10:e034027. doi: 10.1136/bmjopen-2019-034027
