# Supplementary material
Source: HighWire-hosted journal article supplement (https://bmjopen.bmj.com/content/10/3/e034027)

 **Aktivität** 

- 1. Juli Diese Woche

 **Wochenübersicht**

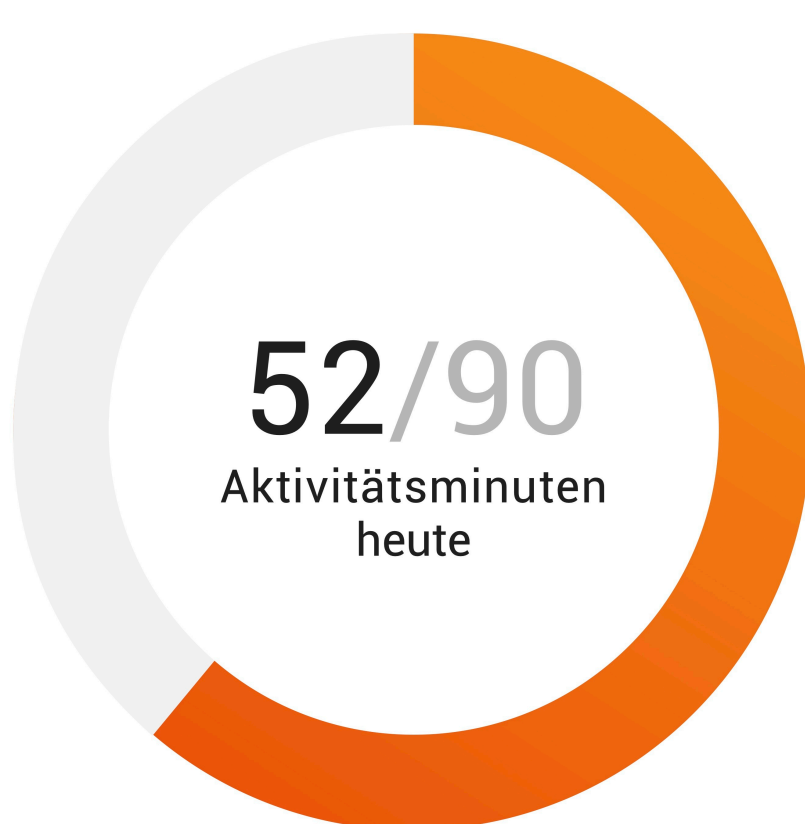

**VIDEA Start März 2019**

*„Ihre Reise beginnt mit Ihrem ersten Schritt.“*

**8.450**  
Schrittzahl heute

 **Eintragen**

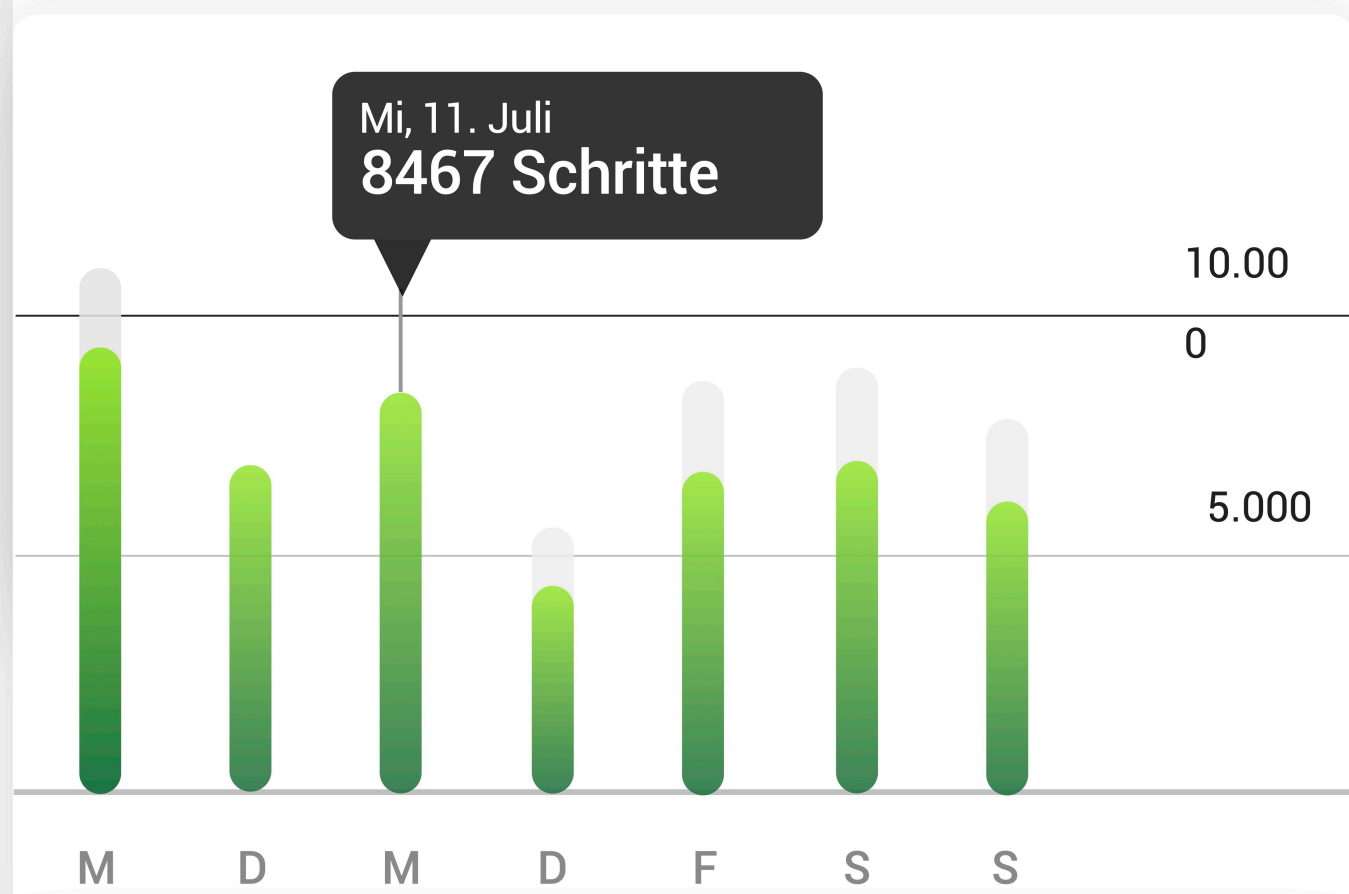

**Gut**  
Stimmung heute

 **Eintragen**

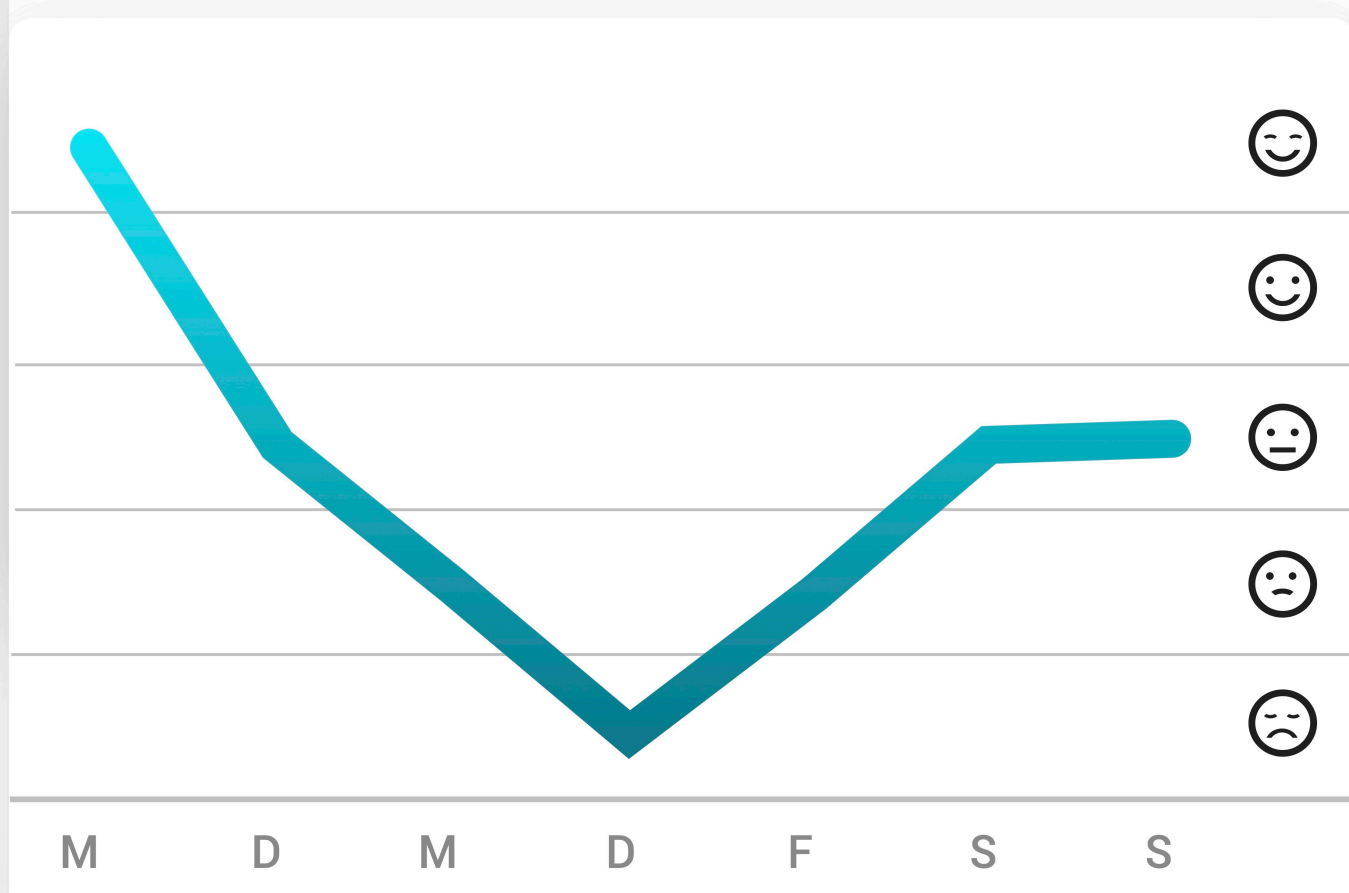

Supplement: inline-supplementary-material-4 [file inline-supplementary-material-4.pdf]
